# Supplementary material
Source: HighWire-hosted journal article supplement (https://bmjophth.bmj.com/content/8/1/e001421)
Supplement: inline-supplementary-material-1 [file inline-supplementary-material-1.pdf]

### Supplemental Figure 1

En-face choroidal vessel density image shows choroidal microvasculature dropout (MvD) area and angular circumference. The points where the MvD's outermost edges met the optic nerve head (ONH) were marked as angular boundaries. The angular circumference was then determined by plotting lines from the ONH center to these boundaries of the MvD.

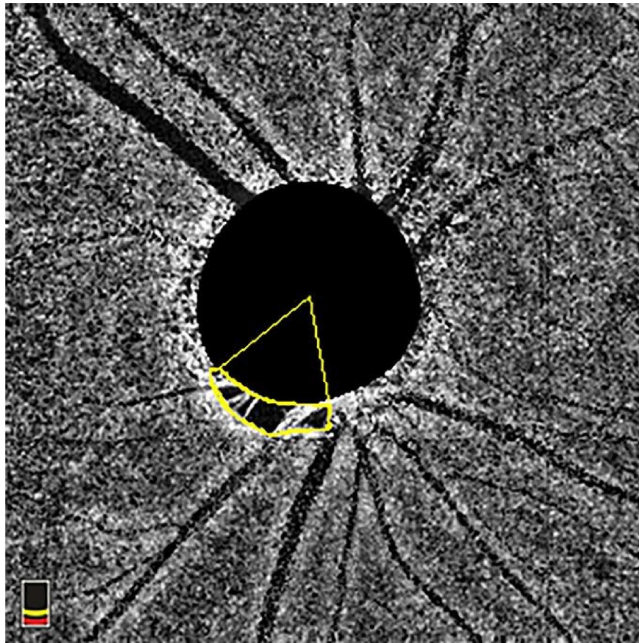

**Supplemental Table 1. Factors Correlated with Choroidal MvD Angle by Univariable and Multivariable Linear Mixed Analysis (n = 223)**

| Variables                            | Univariable Model        |                  | Multivariable Model     |                  |
|--------------------------------------|--------------------------|------------------|-------------------------|------------------|
|                                      | coefficient, 95% CI      | P value          | coefficient, 95% CI     | P value          |
| Age (year) per 10 years              | -1.05 (-8.53 to 6.43)    | 0.782            | -0.86 (-7.84 to 6.12)   | 0.808            |
| Sex: male                            | 3.46 (-11.85 to 18.77)   | 0.656            | -3.44 (-18.68 to 11.80) | 0.656            |
| Race: African American               | -6.32 (-25.10 to 12.45)  | 0.507            | -2.45 (-20.03 to 15.13) | 0.784            |
| Hypertension                         | 0.17 (-15.11 to 15.45)   | 0.983            |                         |                  |
| Diabetes                             | -20.79 (-37.56 to -4.02) | <b>0.015</b>     | -17.52 (-36.97 to 1.93) | 0.077            |
| Axial length, per 1mm longer         | 5.19 (-0.40 to 10.78)    | 0.069            |                         |                  |
| CCT, per 1 $\mu$ m thinner           | 0.05 (-0.12 to 0.21)     | 0.582            |                         |                  |
| IOP, per 1 mmHg higher               | 0.54 (-0.68 to 1.76)     | 0.384            |                         |                  |
| 24-2 VF MD, per 1 dB worse           | 3.03 (1.84 to 4.21)      | <b>&lt;0.001</b> | 2.82 (1.69 to 3.95)     | <b>&lt;0.001</b> |
| Average SSI, per 1 higher            | 0.24 (-0.49 to 0.97)     | 0.513            |                         |                  |
| Smoking intensity, per 10 pack-years | 7.69 (2.06 to 13.32)     | <b>0.008</b>     | 0.57 (-0.02 to 1.17)    | 0.059            |

CCT = central corneal thickness; IOP = intraocular pressure; MD = mean deviation; SSI = signal strength index; VF = visual field; wiCD = whole image capillary density. Values are shown in mean (95% confidence interval), unless otherwise indicated. Bold text indicates p-value with <0.05.

**Supplemental Table 2. Factors Correlated with Choroidal MvD Area by Univariable and Multivariable Linear Mixed Analysis in Eyes with Early Glaucoma (n = 119)**

| Variables                            | Univariable Model      |              | Multivariable Model   |         |
|--------------------------------------|------------------------|--------------|-----------------------|---------|
|                                      | coefficient, 95% CI    | P value      | coefficient, 95% CI   | P value |
| Age (year) per 10 years              | -0.81 (-3.99 to 2.38)  | 0.616        | -1.29 (-4.78 to 2.20) | 0.466   |
| Sex: male                            | 2.40 (-4.07 to 8.87)   | 0.464        | 3.38 (-3.74 to 10.51) | 0.348   |
| Race: African American               | -3.63 (-10.08 to 2.82) | 0.267        | -3.53 (-9.67 to 2.60) | 0.256   |
| Hypertension                         | -1.30 (-7.59 to 5.00)  | 0.683        |                       |         |
| Diabetes                             | -0.41 (-8.30 to 7.48)  | 0.918        |                       |         |
| Axial length, per 1mm longer         | 1.65 (-1.28 to 4.58)   | 0.267        |                       |         |
| CCT, per 1 $\mu$ m thinner           | 0.00 (-0.07 to 0.07)   | 0.960        |                       |         |
| IOP, per 1 mmHg higher               | -0.18 (-0.67 to 0.30)  | 0.453        |                       |         |
| 24-2 VF MD, per 1 dB worse           | 1.72 (0.03 to 3.41)    | <b>0.046</b> | 1.80 (-0.05 to 3.66)  | 0.057   |
| Average SSI, per 1 higher            | 0.00 (-0.35 to 0.36)   | 0.987        |                       |         |
| Smoking intensity, per 10 pack-years | -0.36 (-2.00 to 1.28)  | 0.665        | -0.08 (-0.27 to 0.11) | 0.432   |

The value of MvD area was multiplied by 100 to enhance the readability of the table (unit for the coefficient is 0.01 mm<sup>2</sup>). CCT = central corneal thickness; IOP = intraocular pressure; MD = mean deviation; SSI = signal strength index; VF = visual field; wiCD = whole image capillary density. Values are shown in mean (95% confidence interval), unless otherwise indicated. Bold text indicates p-value with <0.05.
